# Supplementary material for: Reactive species formed upon interaction of water with fine particulate matter from remote forest and polluted urban air
Source: Copernicus journal article supplement (doi:10.5194/acp-2020-973), 2020-10-20
Supplement: Supplementary file 1 [file acp-2020-973-supplement.pdf]

1

*Supplementary of*

2   **Reactive species formed upon interaction of water with fine particulate matter**  
3   **from remote forest and polluted urban air**

4   H. Tong *et al.*

5   *Correspondence to:* Haijie Tong (h.tong@mpic.de).

## **Influence of PM<sub>2.5</sub> extract concentration on the radical yield.**

To assess the influence of the PM<sub>2.5</sub> extract concentrations on our results, we compared the mass-specific radical yields by different concentration of Beijing PM<sub>2.5</sub> extracts. We found the yield difference is on average for 37% among all extract samples. However, we did not see clear trend from low to high concentration of PM<sub>2.5</sub> extracts. Then we showed the PM<sub>2.5</sub> extract concentrations of each sample as well as the radical yields by different concentration of PM<sub>2.5</sub> extracts in Figure S1. Figures S1a-1c indicate that PM<sub>2.5</sub> extract concentrations of Hyytiälä and Mainz samples have narrower range distribution than Beijing samples. Figure S1d and 1e showed that radical yields by 500 µg mL<sup>-1</sup> fine PM<sub>2.5</sub> overlapped the yields by 250-6400 µg mL<sup>-1</sup> PM. Thus, the concentration of the PM<sub>2.5</sub> extracts has small impact on our results about RS yields. To evaluate the influence of PM<sub>2.5</sub> extract concentrations on the relative yields of different radicals, we measured the relative yields of different radicals by Beijing PM<sub>2.5</sub> (n=3) in 250, 500, and 1000 µg mL<sup>-1</sup> PM<sub>2.5</sub> extracts. We found the relative yields of •OH, O<sub>2</sub>•<sup>-</sup>, C- and O-centered organic radicals have standard deviations of ~10%, ~9%, ~2%, and ~2%, respectively.

## **Estimation of the abundance of organic hydroperoxides and humic-like substances in PM<sub>2.5</sub>**

Based on the compiled abundance of humic-like substances in PM<sub>2.5</sub> (Table S3), we obtained an averaged value of 7%, and we assumed that 15% of these PM<sub>2.5</sub>-bound humic-like substances are extractable humic acid-like substances (Katsumi et al., 2019). Given that the concentration of PM<sub>2.5</sub> in aqueous extracts in this study ranged from 250 to 6500 µg mL<sup>-1</sup>, thus the estimated concentration of humic acid-like substances typically ranged from 3 to 70 µg mL<sup>-1</sup>. We assumed that 75% of the PM<sub>2.5</sub>-bound humic-like substances are attributable to humic acid-like substances, thus the estimated concentration of extractable fulvic acid-like substances typically ranged from 15 to 350 µg mL<sup>-1</sup>. To simulate the RS formation by Mainz and Beijing PM<sub>2.5</sub>, we used 4 µg mL<sup>-1</sup> humic acid standard. To investigate the influence of humic-like substances on the RS formation by Fenton-like reactions, we used 6-180 µg mL<sup>-1</sup> humic or fulvic acid for surrogate mixture measurements.

To estimate the abundance of organic hydroperoxide in ambient PM<sub>2.5</sub>, we assumed that the mass fractions of SOA in Hyytiälä, Mainz, and Beijing PM<sub>2.5</sub> were 60%, 25%, and 15%, respectively (Jimenez

et al., 2009). We also assumed that 2%, 2%, and 1% of Hyytiälä, Mainz, and Beijing SOA mass are attributable to organic hydroperoxides (Tong et al., 2018), which was assumed to have an averaged molecular weight of 300 g mol<sup>-1</sup> (Docherty et al., 2005). In this case, the estimated concentration of organic hydroperoxides in the PM<sub>2.5</sub> extracts in this study was 5-35 μM. To simulate the RS formation by Hyytiälä, Mainz, and Beijing fine PM<sub>2.5</sub>, we used 50, 25, and 0 μM cumene hydroperoxide (CHP), respectively. To investigate the RS yield of Fenton-like reactions, we used 50-100 μM CHP.

### **H<sub>2</sub>O<sub>2</sub> yield of PM from other sources**

The air sample volume-specific and mass-specific H<sub>2</sub>O<sub>2</sub> yields as well as total RS yields of fine PM from other sites that different from Hyytiälä, Mainz, and Beijing are shown in Figure S4 and Table S5. Therein the H<sub>2</sub>O<sub>2</sub> yields were measured using *p*-hydroxyphenylacetic acid (PHOPAA) as probe, and the total RS yields were measured using dichlorofluorescein (DCFH) assay as probe (Lazrus et al., 1985; Wang and Joseph, 1999; Kalyanaraman et al., 2012). Figure S4a shows that the air sample volume-specific H<sub>2</sub>O<sub>2</sub> yields of fine PM from CRC-AES and different districts of UCLA exhibit a positive correlation with the concentration of PM<sub>2.5</sub> (R<sup>2</sup>=0.60). In contrast, the mass-specific H<sub>2</sub>O<sub>2</sub> yields exhibit no correlation with the PM<sub>2.5</sub> concentration (R<sup>2</sup>=0.02, Figure S4b). Moreover, the DCFH-based total RS yields were overall higher than the H<sub>2</sub>O<sub>2</sub> (Table S5), agreeing with this study.

### **Influence of H<sub>2</sub>O<sub>2</sub> on the radical yield of Fenton-like reactions**

We investigated the influence of H<sub>2</sub>O<sub>2</sub> concentration on the radical yield of Fenton-like reactions initiated by mixtures comprising 100 μM CHP, 300 μM Fe<sup>2+</sup>, 11 μg mL<sup>-1</sup> HA, and 79 μg mL<sup>-1</sup> FA. Figure S5a shows that as the concentration of H<sub>2</sub>O<sub>2</sub> is increased from 0 to 300 μM, the concentration of total radicals increase from ~8.0 to ~18.4 μM, with the RF of •OH and O-centered organic radicals increase from ~18 to ~69% and from ~7 to ~26% (Figure S5b), confirming the enhanced radical formation through Fenton-like reactions (Gligorovski et al., 2015). In contrast, the RF of C-centered radicals and O<sub>2</sub>• decrease from ~25 to ~2% and from ~51 to ~3%, reflecting a plausible conversion of C-centered radicals to O-centered organic radicals via oxidation pathways (Chevallier et al., 2004; Tong et al., 2016). Thus, H<sub>2</sub>O<sub>2</sub> can significantly

influence the total and relative yields of different types of radicals by Fenton-like reactions, and humic-like substances may co-mediate the radical formation.

#### **Influence of HA and FA on the radical yields of Fenton-like reactions initiated by Cu<sup>2+</sup>**

Figure S7a shows that the concentration of radicals formed by Cu<sup>2+</sup> and cumene hydroperoxide (CHP) mixtures exhibited a positive correlation with the concentration of Cu<sup>2+</sup>. However, the Cu<sup>2+</sup> played a less effective role than Fe<sup>2+</sup> in initiating Fenton-like reactions via radical formation pathways, with 300 μM Cu<sup>2+</sup> and 50 μM CHP produced ~1.8 μM radicals.

Figure S7b shows that as the concentration of Cu<sup>2+</sup> increased from 15 to 75 μM, the RF of •OH and O<sub>2</sub>•<sup>-</sup> decreased from ~44% to ~18% and from ~1.6% to ~0.1%. However, the RF of C- and O-centered organic radicals increased from ~39% to ~61% and from ~15% to ~21%, respectively. As the concentration of Cu<sup>2+</sup> is increased further to 150 and 300 μM, the RF of •OH, O<sub>2</sub>•<sup>-</sup>, C- and O-centered organic radicals varied slightly, reflecting a low reactivity of Cu<sup>2+</sup> with CHP.

Figure S7c shows that concentration of radicals formed by reactions of 100 μM CHP with 300 μM Cu<sup>2+</sup> and HA decreased from ~2.3 to ~1.8 μM as the increasing of HA concentration from 0 to 180 μg mL<sup>-1</sup>. This might mainly be associated with the low catalytic effect of Cu<sup>2+</sup> in initiating Fenton-like reactions (Figure S5a). Beyond this, humic-like substances have been found to exhibit strong copper-binding ability (Kogut and Voelker, 2001), and 8-fold more Cu<sup>2+</sup> than Fe<sup>2+</sup> ions from Melpitz (Germany) PM were expected to be complexed by humic-like substances (Scheinhardt et al., 2013). We thus inferred that the Cu-HA complex might significantly influence the reactivity of Cu<sup>2+</sup> in Fenton-like reactions. Finally, partial of the radical yield decay in Figure S7a might be caused by the antioxidant effect of HA (Aeschbacher et al., 2012). Figure S7d shows that as the concentration of HA increased from 6 to 180 μg mL<sup>-1</sup>, the RF of •OH and O-centered organic radicals increased from ~17 to ~44% and from ~16 to ~28%, respectively. The RF variation of •OH, C- and O-centered organic radicals in Figure S7d had a different trend from the results in Figure 6d, reflecting different impacts of HA on Cu and Fe initiated Fenton-like reactions. Compared to the

increasing RF of  $\bullet\text{OH}$  and O-centered organic radicals, the RF of C-centered radicals decreased from ~66 to ~28%, and the RF of  $\text{O}_2\bullet$  only varied slightly between 0.8 and 1.5%.

Figure S7e shows that the radical yields of the mixtures consisting of 100  $\mu\text{M}$  CHP, 300  $\mu\text{M}$   $\text{Cu}^{2+}$ , and FA only varied from ~0.9 to ~0.4  $\mu\text{M}$  as the increasing FA concentration from 6 to 180  $\mu\text{g mL}^{-1}$ , which may mainly be associated with the low catalytic effect of  $\text{Cu}^{2+}$  as well as the formation of Cu-FA complexes. Figure S7f indicates that as the concentration of FA increased from 0 to 180  $\mu\text{g mL}^{-1}$ , the RF of C-centered radicals steeply increased from ~57 to ~89%, whereas the RF of O-centered organic radicals and  $\bullet\text{OH}$  exhibited overall decrease from ~25% and ~16% to ~3%.

89 **Table S1. Sampling information.**

| City     | Location             | Sampler                                                           | Flow rate<br>(L min <sup>-1</sup> ) | Sampling<br>time (h) <sup>a</sup> | Sampling period                                             | Sample<br>numbers |
|----------|----------------------|-------------------------------------------------------------------|-------------------------------------|-----------------------------------|-------------------------------------------------------------|-------------------|
| Hyytiälä | 61.51°N,<br>24.17°E  | Dekati® PM10<br>impactor (Finland)                                | 30                                  | 48-72                             | 31 May-19 July 2017                                         | 11                |
| Mainz    | 49.99°N,<br>8.23°E   | MOUDI (MSP<br>corporation, USA) <sup>b</sup>                      | 30                                  | 24-54                             | 22 Aug.-17 Nov. 2017<br>23-31 Aug. 2018                     | 11                |
| Beijing  | 116.31°E,<br>39.99°N | PM <sub>2.5</sub> sampler (TH-<br>16, Tianhong<br>company, China) | 30                                  | 5-24                              | 20 Dec. 2016-13 Jan.<br>2017<br>6 Nov. 2017-17 Jan.<br>2018 | 20                |

90 <sup>a</sup> The sampling time is for one filter

91 <sup>b</sup> MOUDI: Micro-Orifice Uniform Deposition Impactor (122R)

92     **Table S2. The range of hyperfine coupling constants that used to fit the BMPO adducts.**

| Spin adduct                      | Hyperfine coupling constant (G) |             |              |
|----------------------------------|---------------------------------|-------------|--------------|
|                                  | $a_N$                           | $a_H^\beta$ | $a_H^\gamma$ |
| BMPO-OH1                         | 12-16                           | 11-12       | 0.5-0.9      |
| BMPO-OH2                         | 14-15                           | 13-14       | 0.6-0.7      |
| BMPO-OOH1                        | 13-14                           | 8-10        | —            |
| BMPO-OOH2                        | 13-14                           | 11-13       | —            |
| BMPO-C-centered radicals         | 14-16                           | 21-23       | —            |
| BMPO-O-centered organic radicals | 14-16                           | 17-18       | —            |

93

94 **Table S3. Compiled abundance of humic-like substances in ambient PM<sub>2.5</sub>.**

| Location         | Time/event       | PM <sub>2.5</sub><br>( $\mu\text{g m}^{-3}$ ) | humic-like<br>substances<br>( $\mu\text{g m}^{-3}$ ) | humic-like<br>substances<br>/PM <sub>2.5</sub> (%) | Reference            |
|------------------|------------------|-----------------------------------------------|------------------------------------------------------|----------------------------------------------------|----------------------|
| Lanzhou          | Winter           | 120.47                                        | 7.24                                                 | 6.0                                                | (Tan et al., 2016)   |
| Lanzhou          | Summer           | 34.12                                         | 2.15                                                 | 6.3                                                | (Tan et al., 2016)   |
| Lanzhou          | Annual           | 77.29                                         | 4.7                                                  | 6.1                                                | (Tan et al., 2016)   |
| Lanzhou          | Haze             | 182.08                                        | 10.06                                                | 5.5                                                | (Tan et al., 2016)   |
| Lanzhou          | No-haze          | 51.65                                         | 3.49                                                 | 6.8                                                | (Tan et al., 2016)   |
| Lanzhou          | Snow             | 80.69                                         | 4.62                                                 | 5.7                                                | (Tan et al., 2016)   |
| PRD <sup>a</sup> | Annual 2007-2008 | 49                                            | 4.9                                                  | 10.0                                               | (Lin et al., 2010)   |
| Guangzhou        | Annual 2009      | 56                                            | 4.8                                                  | 8.6                                                | (Kuang et al., 2015) |
| Beijing          | Winter 2011      | 108                                           | 8.9                                                  | 8.2                                                | (Lang et al., 2017)  |
| Beijing          | Summer           | 98                                            | 5.5                                                  | 5.9                                                | (Li et al., 2019)    |
| Beijing          | Autumn           | 58                                            | 5.6                                                  | 9.4                                                | (Li et al., 2019)    |
| Beijing          | Winter           | 150                                           | 12.3                                                 | 7.9                                                | (Li et al., 2019)    |
| Beijing          | Spring           | 120                                           | 6.5                                                  | 4.8                                                | (Li et al., 2019)    |
| Average          |                  | 91.2                                          | 6.2                                                  | 7.0                                                |                      |

95 PRD: Pearl River Delta Region in China

96 **Table S4. The yields of different types of radicals and concentrations of different water-soluble**  
97 **transition metal species in PM<sub>2.5</sub> extracts.**

| Location | Radicals (pmol m <sup>-3</sup> )  |             |                    |                               | Water-soluble transition metals (pmol m <sup>-3</sup> )  |               |               |             |              |
|----------|-----------------------------------|-------------|--------------------|-------------------------------|----------------------------------------------------------|---------------|---------------|-------------|--------------|
|          | •OH                               | C-centered  | O-centered organic | O <sub>2</sub> • <sup>-</sup> | Fe                                                       | Mn            | Cu            | V           | Ni           |
| Hyytiälä | 0.4 ± 0.2                         | 2.2 ± 1.4   | 0.1 ± 0.1          | 0.02 ± 0.01                   | 26.0 ± 16.0                                              | 4.9 ± 4.8     | 3.1 ± 1.2     | 2.5 ± 1.7   | 0.04 ± 0.01  |
| Mainz    | 2.1 ± 1.3                         | 1.8 ± 0.7   | 0.2 ± 2            | 0.1 ± 0.1                     | 269.0 ± 113.0                                            | 28.0 ± 12.0   | 55.0 ± 17.0   | 2.9 ± 0.8   | 1.2 ± 0.4    |
| Beijing  | 3.6 ± 2.6                         | 2.5 ± 1.7   | 0.3 ± 0.2          | 0.2 ± 0.3                     | (3300.0 ± 2300.0)                                        | 640.0 ± 531.0 | 452.0 ± 385.0 | 23.0 ± 23.0 | 51.0 ± 25.0  |
| Location | Radicals (pmol µg <sup>-1</sup> ) |             |                    |                               | Water-soluble transition metals (pmol µg <sup>-1</sup> ) |               |               |             |              |
|          | •OH                               | C-centered  | O-centered organic | O <sub>2</sub> • <sup>-</sup> | Fe                                                       | Mn            | Cu            | V           | Ni           |
| Hyytiälä | 0.08 ± 0.004                      | 0.5 ± 0.2   | 0.03 ± 0.01        | 0.01 ± 0.01                   | 5.5 ± 1.5                                                | 1.0 ± 0.5     | 0.7 ± 0.3     | 0.5 ± 0.2   | 0.01 ± 0.003 |
| Mainz    | 0.2 ± 0.1                         | 0.1 ± 0.07  | 0.02 ± 0.02        | 0.01 ± 0.01                   | 18.0 ± 4.9                                               | 1.9 ± 0.7     | 3.9 ± 0.6     | 0.2 ± 0.03  | 0.08 ± 0.03  |
| Beijing  | 0.04 ± 0.04                       | 0.02 ± 0.02 | 0.003 ± 0.002      | 0.002 ± 0.002                 | 20.0 ± 7.0                                               | 4.5 ± 2.6     | 2.3 ± 0.4     | 0.2 ± 0.2   | 0.5 ± 0.5    |

98

99 **Table S5. Statistic of H<sub>2</sub>O<sub>2</sub> or RS yields of ambient PM at different locations.**

| Sampling site         | PM type           | PM ( $\mu\text{g m}^{-3}$ ) | Sampling time      | Method     | Analyte                       | H <sub>2</sub> O <sub>2</sub> or RS ( $\text{pmol m}^{-3}$ ) | H <sub>2</sub> O <sub>2</sub> or RS ( $\text{pmol } \mu\text{g}^{-1}$ ) | Reference                |
|-----------------------|-------------------|-----------------------------|--------------------|------------|-------------------------------|--------------------------------------------------------------|-------------------------------------------------------------------------|--------------------------|
| Hyytiälä              | PM <sub>2.5</sub> | $5 \pm 2$                   | Jun-Jul 2017       | MAK165     | H <sub>2</sub> O <sub>2</sub> | $10 \pm 8$                                                   | $1.9 \pm 0.9$                                                           | This study               |
| UCLA Pacific coast    | Fine              | $13 \pm 10$                 | May 2014-Jan 2015  | PHOPAA+HRP | H <sub>2</sub> O <sub>2</sub> | $12 \pm 9$                                                   | $1.0 \pm 0.9$                                                           | (Arellanes et al., 2006) |
| MPI-C at Mainz        | PM <sub>1.8</sub> | $16 \pm 2$                  | Aug-Sep 2017       | MAK165     | H <sub>2</sub> O <sub>2</sub> | $47 \pm 17$                                                  | $3.3 \pm 1.1$                                                           | This study               |
| UCLA                  | PM <sub>2.5</sub> | $16 \pm 7$                  | 2009-2010          | PHOPAA+HRP | H <sub>2</sub> O <sub>2</sub> | $47 \pm 21$                                                  | $3.0 \pm 2.0$                                                           | (Wang et al., 2012)      |
| CRC-AES, UC Riverside | PM <sub>2.5</sub> | $19 \pm 6$                  | Jun-Aug 2008       | PHOPAA+HRP | H <sub>2</sub> O <sub>2</sub> | $(2.7 \pm 2.1) \times 10^2$                                  | $1.4 \pm 1.6$                                                           | (Wang et al., 2012)      |
| UCLA freeway site     | Fine              | $23 \pm 8$                  | Jan-May 2004       | PHOPAA+HRP | H <sub>2</sub> O <sub>2</sub> | $17 \pm 90$                                                  | $0.7 \pm 1.1$                                                           | (Arellanes et al., 2006) |
| UCLA Pacific coast    | Coarse            | $26 \pm 15$                 | Jul 2004           | PHOPAA+HRP | H <sub>2</sub> O <sub>2</sub> | $31 \pm 9$                                                   | $1.2 \pm 0.6$                                                           | (Arellanes et al., 2006) |
| UCLA freeway site     | Coarse            | $27 \pm 33$                 | Jul 2004           | PHOPAA+HRP | H <sub>2</sub> O <sub>2</sub> | $15 \pm 9$                                                   | $0.6 \pm 0.3$                                                           | (Arellanes et al., 2006) |
| UC Riverside campus   | PM <sub>2.5</sub> | $39 \pm 22$                 | Aug 2005           | PHOPAA+HRP | H <sub>2</sub> O <sub>2</sub> | $(1.2 \pm 1.1) \times 10^3$                                  | $28.0 \pm 20.0$                                                         | (Wang et al., 2012)      |
| UCLA campus           | Coarse            | $46 \pm 22$                 | Aug 2005           | PHOPAA+HRP | H <sub>2</sub> O <sub>2</sub> | $(5.0 \pm 2.4) \times 10^2$                                  | $14.1 \pm 9.4$                                                          | (Wang et al., 2010)      |
| UCLA upwind Riverside | Coarse            | $97 \pm 27$                 | Jun-Aug 2008       | PHOPAA+HRP | H <sub>2</sub> O <sub>2</sub> | $(1.0 \pm 0.4) \times 10^3$                                  | $10.9 \pm 5.3$                                                          | (Wang et al., 2010)      |
| Beijing               | PM <sub>2.5</sub> | $201 \pm 160$               | Dec 2016- Jan 2017 | MAK165     | H <sub>2</sub> O <sub>2</sub> | $190 \pm 120$                                                | $3.4 \pm 5.6$                                                           | This study               |
| Taipei                | Coarse            | $7.5 \pm 2.8$               | Jul-Sep 2000       | DCFH+HRP   | RS                            | $64 \pm 33$                                                  | $8.5 \pm 11.8$                                                          | (Hung and Wang, 2001)    |
| Bern                  | PM <sub>2.5</sub> | $10 \pm 5$                  | Nov 2014           | DCFH+HRP   | RS                            | $(4.9 \pm 2.9) \times 10^2$                                  | 50                                                                      | (Zhou et al., 2018)      |

|                           |                   |              |                |          |    |                             |              |                             |
|---------------------------|-------------------|--------------|----------------|----------|----|-----------------------------|--------------|-----------------------------|
| Atlanta                   | PM <sub>2.5</sub> | 10.5 ± 3.2   | 12-17 Jul 2012 | DCFH+HRP | RS | $(1.6 \pm 0.2) \times 10^2$ | 14.8 ± 4.5   | (King and Weber, 2013)      |
| Atlanta                   | PM <sub>2.5</sub> | 11.5 ± 4.3   | 8-31 May 2012  | DCFH+HRP | RS | $(2.6 \pm 0.1) \times 10^2$ | 22.6 ± 3.0   | (King and Weber, 2013)      |
| Atlanta                   | PM <sub>2.5</sub> | 13.2 ± 4.8   | 8-29 Jun 2012  | DCFH+HRP | RS | $(1.4 \pm 0.1) \times 10^2$ | 10.6 ± 1.9   | (King and Weber, 2013)      |
| Atlanta                   | PM <sub>2.5</sub> | 13.2 ± 5.4   | 3-31 Jul 2012  | DCFH+HRP | RS | $(2.4 \pm 0.1) \times 10^2$ | 18.2 ± 1.8   | (King and Weber, 2013)      |
| London                    | PM <sub>2.5</sub> | 5-28         | not reported   | DCFH+HRP | RS | $(0.4-2.4) \times 10^4$     | not reported | (Wragg et al., 2016)        |
| Singapore (campus)        | PM <sub>2.5</sub> | 19 ± 2       | Dec 2005       | DCFH+HRP | RS | $(5.7 \pm 0.7) \times 10^3$ | 0.3          | (See et al., 2007)          |
| Taipei                    | PM <sub>3.2</sub> | 31 ± 15      | Jul-Sep 2000   | DCFH+HRP | RS | $(5.4 \pm 0.5) \times 10^2$ | 17.6 ± 29.2  | (Hung and Wang, 2001)       |
| Singapore (curbside)      | PM <sub>2.5</sub> | 33 ± 6       | Dec 2005       | DCFH+HRP | RS | $(1.5 \pm 0.2) \times 10^4$ | 460          | (See et al., 2007)          |
| Milan (traffic site)      | TSP               | 50 ± 7       | July 2013      | DCFH+HRP | RS | $(1.4 \pm 0.7) \times 10^2$ | 2.73 ± 1.29  | (Perrone et al., 2016)      |
| Milan (low emission zone) | TSP               | 52 ± 19      | Oct 2013       | DCFH+HRP | RS | $(2.0 \pm 1.1) \times 10^2$ | 3.74 ± 1.41  | (Perrone et al., 2016)      |
| Milan (traffic site)      | TSP               | 57 ± 19      | Oct 2013       | DCFH+HRP | RS | $(2.4 \pm 1.3) \times 10^2$ | 4.02 ± 1.77  | (Perrone et al., 2016)      |
| Beijing                   | PM <sub>2.5</sub> | 5-110        | Aug-Sep 2015   | DCFH+HRP | RS | $(0.2-3.6) \times 10^4$     | not reported | (Huang et al., 2018)        |
| Beijing                   | PM <sub>2.5</sub> | 74 ± 58      | Dec 2014       | DCFH+HRP | RS | $(1.3 \pm 0.5) \times 10^4$ | 179.6 ± 87.8 | (Huang et al., 2016)        |
| Beijing                   | PM <sub>2.5</sub> | 79 ± 59      | Apr 2015       | DCFH+HRP | RS | $(5.8 \pm 2.6) \times 10^3$ | 73.6 ± 43.4  | (Huang et al., 2016)        |
| Milan (traffic site)      | TSP               | 129 ± 60     | Jan-Feb 2013   | DCFH+HRP | RS | $(3.6 \pm 0.8) \times 10^2$ | 2..99 ± 1.52 | (Perrone et al., 2016)      |
| Rubidoux, CA              | PM <sub>2.5</sub> | not reported | Jul 2003       | DCFH+HRP | RS | $(4.7 \pm 0.4) \times 10^3$ | not reported | (Venkatachari et al., 2005) |
| Rochester, NY             | PM <sub>2.5</sub> | not reported | Aug 2009       | DCFH+HRP | RS | $(8.3 \pm 2.2) \times 10^3$ | not reported | (Wang et al., 2011)         |

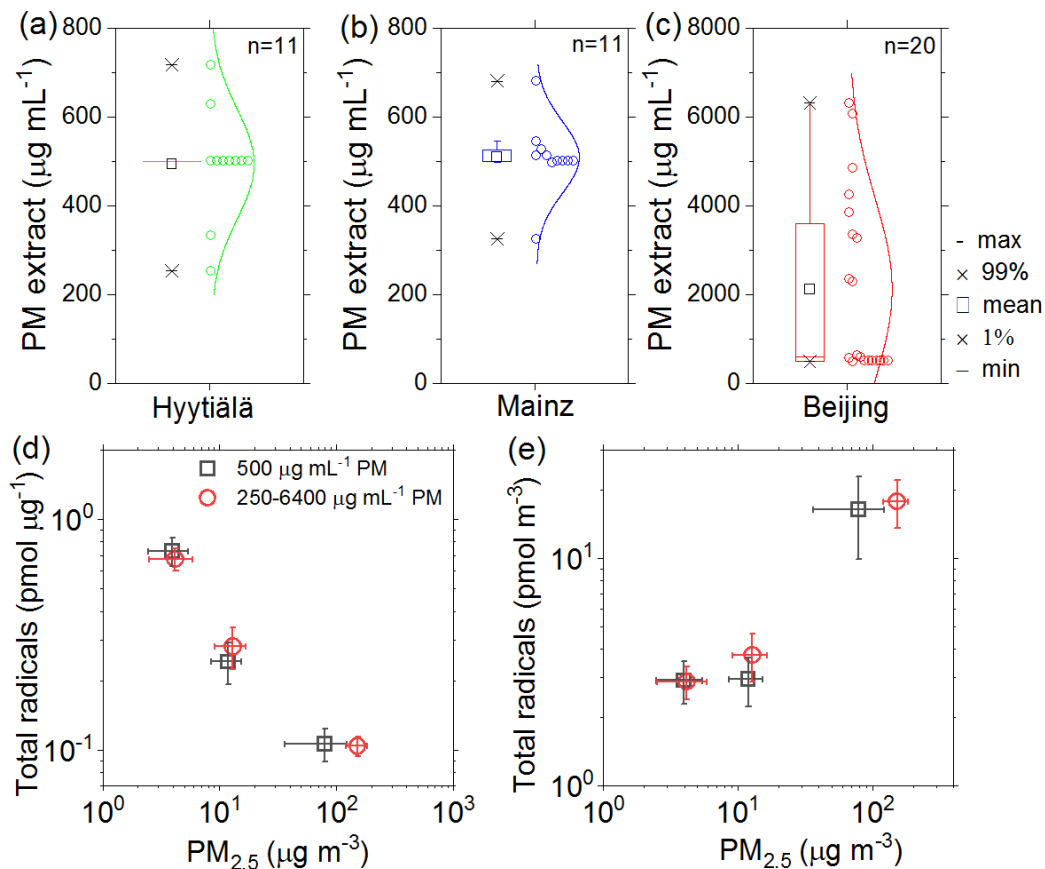

**Figure S1.** (a-c) Concentrations of  $PM_{2.5}$  in aqueous extracts of each filter samples. (d) Mass-specific radical yields by different concentrations of  $PM_{2.5}$  in water versus the concentration of ambient  $PM_{2.5}$  in air. (e) Air sample volume-specific radical yields by different concentrations of  $PM$  versus the concentration of ambient  $PM_{2.5}$ . The error bars denote the standard errors (11-20 samples per location).

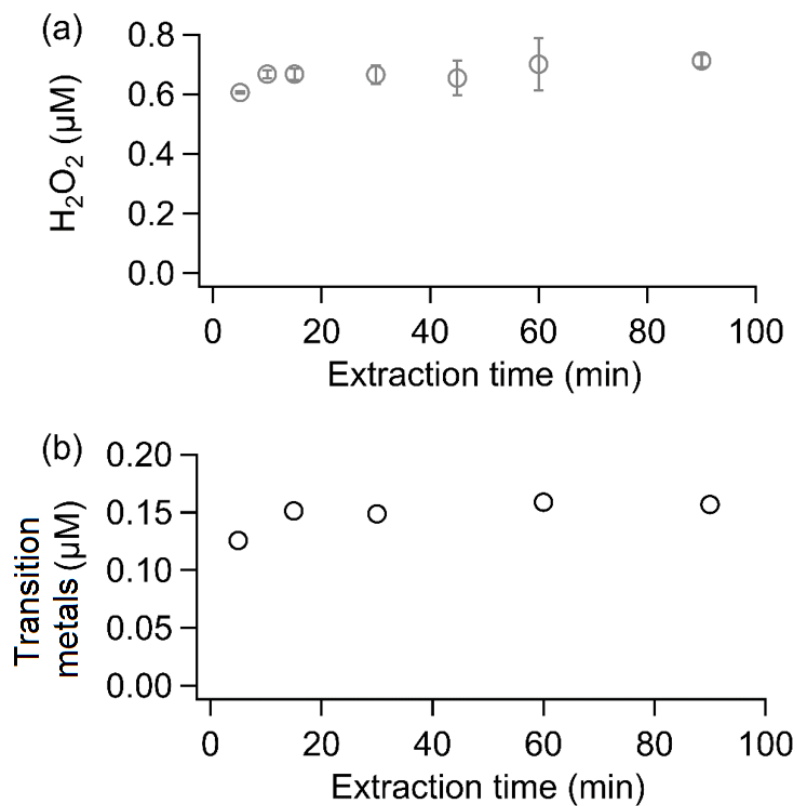

**Figure S2.** (a) Temporal evolution of  $\text{H}_2\text{O}_2$  concentration in water extracts during the extraction process. Error bars represent standard deviation of duplicate measurements. (b) Temporal evolution of water-soluble transition metal concentration in water extracts during the extraction process. The  $\text{H}_2\text{O}_2$  and transition metal concentrations became constant after  $\sim 15$  min's extraction. The filter used for these tests was collected at Mainz from 25 to 27 Oct. 2017.

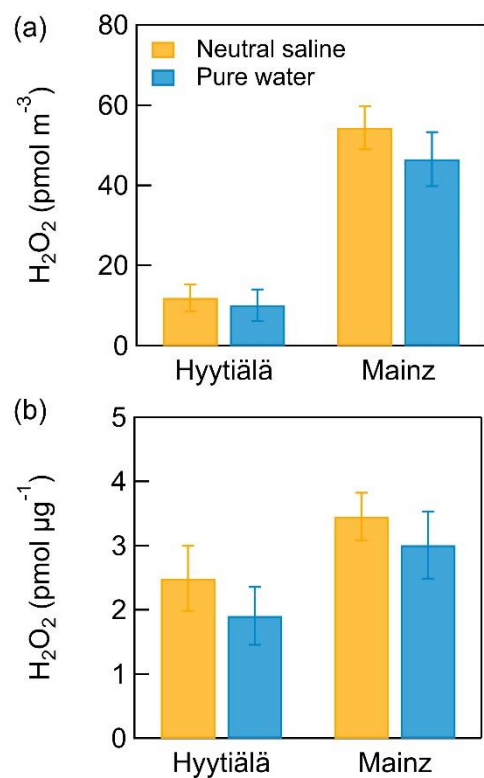

112  
 113 **Figure S3.** (a) Air sample volume-specific and (b) mass-specific  $H_2O_2$  yield of Hyytiälä and Mainz fine  
 114 PM in neutral saline (yellow column) and pure water (blue column). The error bars represent standard  
 115 deviations of mean (11-12 samples per location).

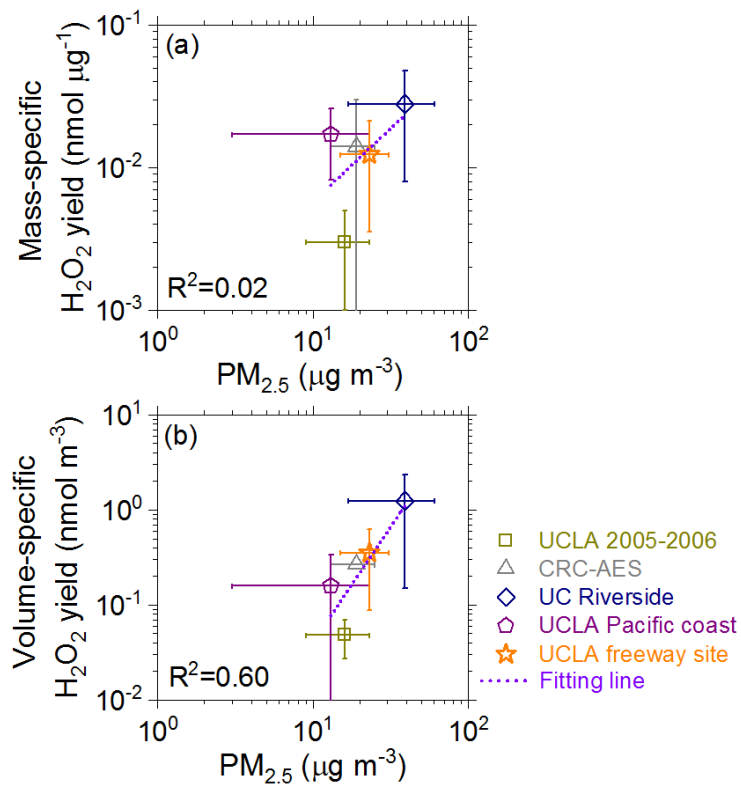

116  
 117 **Figure S4.** (a) Mass-specific and (b) air sample volume-specific  $\text{H}_2\text{O}_2$  and RS yields of PM from different  
 118 sites. The error bars represent standard deviation.

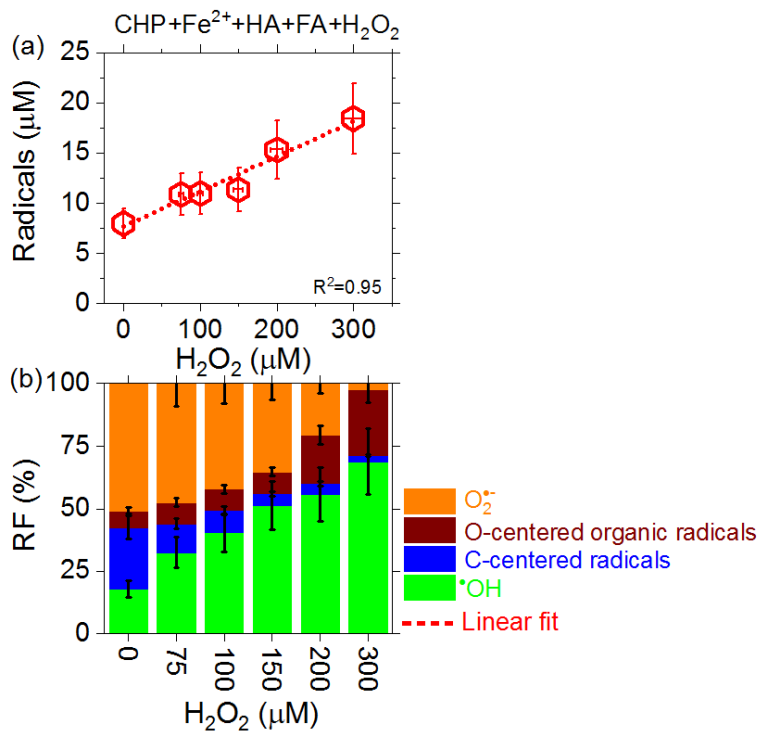

119  
 120 **Figure S5.** (a) Total radical yield and (b) relative fractions (RF) of individual radicals observed in aqueous  
 121 surrogate mixtures of CHP,  $\text{Fe}^{2+}$ , HA, FA, and  $\text{H}_2\text{O}_2$ . CHP: 100  $\mu\text{M}$ .  $\text{Fe}^{2+}$ : 300  $\mu\text{M}$ . HA: 100  $\mu\text{g mL}^{-1}$ . FA:  
 122 80  $\mu\text{g mL}^{-1}$ .  $\text{H}_2\text{O}_2$ : 0-300  $\mu\text{M}$ . The error bars represent uncertainties of signal integration of EPR spectra  
 123 (for y-axis) or experimental uncertainties of the solution concentration (for x-axis).

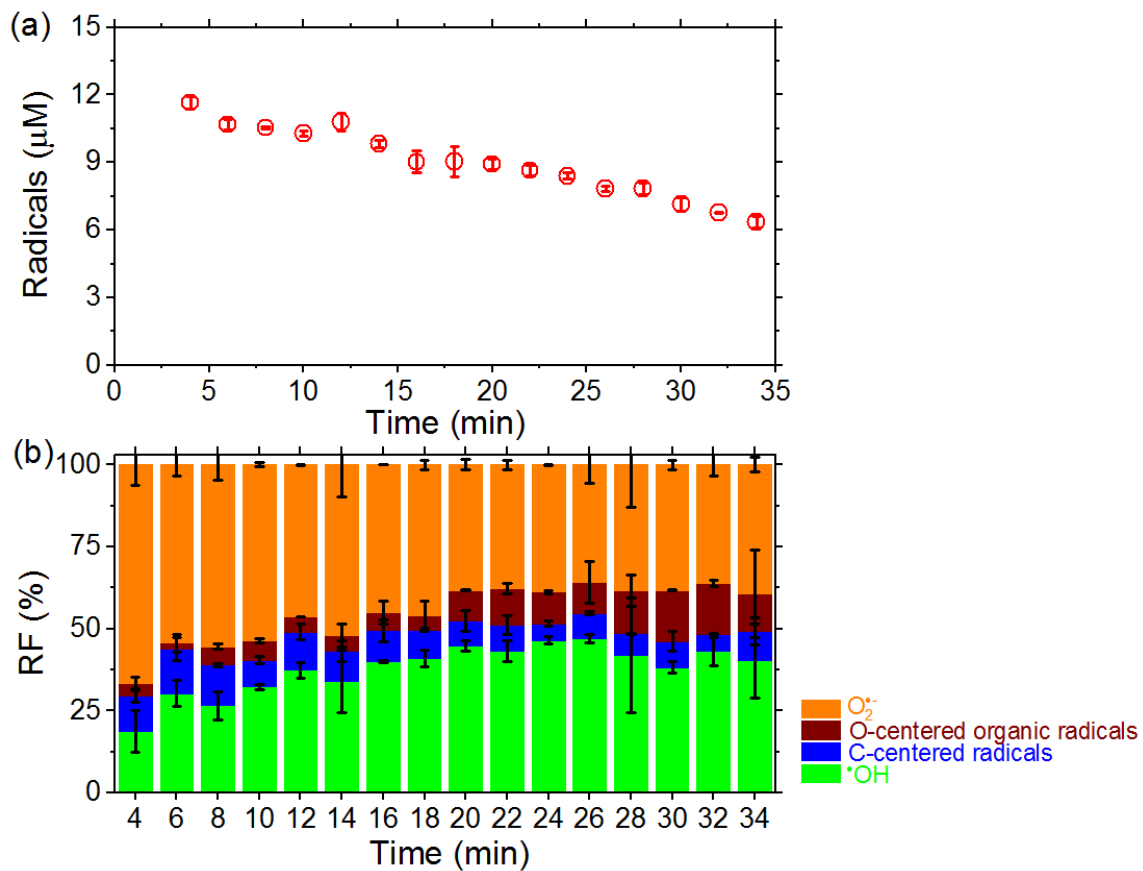

**Figure S6.** (a) Temporal evolution of total radical concentration and (b) relative fractions (RF) of individual radical species in aqueous mixtures of 100  $\mu\text{M}$  CHP and 300  $\mu\text{M}$   $\text{Fe}^{2+}$ . Error bars represent standard deviation of duplicate measurements.

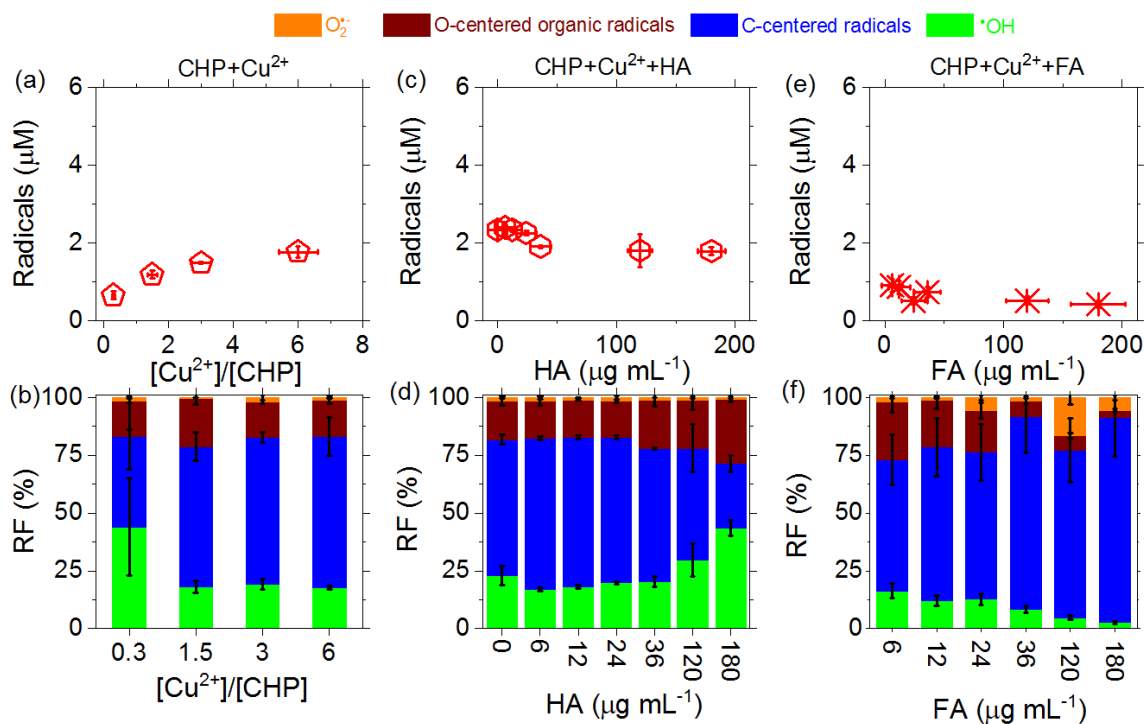

**Figure S7.** (a, c, e) Concentration of totally formed radicals and (b, d, f) RF of individual radicals in aqueous mixtures comprising CHP, Cu<sup>2+</sup>, HA, or FA. The concentration of CHP in (a) and (b) is 50 μM. The concentrations of CHP and Cu<sup>2+</sup> in (c-f) are 100 and 300 μM. The error bars in (a) to (d) represent standard errors of the mean (3-5 samples per data point, a, b). The error bars for x- and y-axis in (e) and (f) represent experimental uncertainties of the solution concentration and signal integration of EPR spectra, respectively.

## References

- Aeschbacher, M., Graf, C., Schwarzenbach, R. P., and Sander, M.: Antioxidant properties of humic substances, *Environ. Sci. Technol.*, 46, 4916-4925, 2012.
- Arellanes, C., Paulson, S. E., Fine, P. M., and Sioutas, C.: Exceeding of Henry's law by hydrogen peroxide associated with urban aerosols, *Environ. Sci. Technol.*, 40, 4859-4866, 2006.
- Chevallier, E., Jolibois, R. D., Meunier, N., Carlier, P., and Monod, A.: "Fenton-like" reactions of methylhydroperoxide and ethylhydroperoxide with  $\text{Fe}^{2+}$  in liquid aerosols under tropospheric conditions, *Atmos. Environ.*, 38, 921-933, 2004.
- Docherty, K. S., Wu, W., Lim, Y. B., and Ziemann, P. J.: Contributions of organic peroxides to secondary aerosol formed from reactions of monoterpenes with  $\text{O}_3$ , *Environ. Sci. Technol.*, 39, 4049-4059, 2005.
- Gligorovski, S., Strekowski, R., Barbati, S., and Vione, D.: Environmental implications of hydroxyl radicals ( $\text{OH}$ ), *Chem. Rev.*, 115, 13051-13092, 2015.
- Huang, W., Zhang, Y., Zhang, Y., Zeng, L., Dong, H., Huo, P., Fang, D., and Schauer, J. J.: Development of an automated sampling-analysis system for simultaneous measurement of reactive oxygen species (ROS) in gas and particle phases: GAC-ROS, *Atmos. Environ.*, 134, 18-26, 2016.
- Huang, W., Fang, D., Shang, J., Li, Z., Zhang, Y., Huo, P., Liu, Z., Schauer, J. J., and Zhang, Y.: Relative impact of short-term emissions controls on gas and particle-phase oxidative potential during the 2015 China Victory Day Parade in Beijing, China, *Atmos. Environ.*, 183, 49-56, 2018.
- Hung, H.-F., and Wang, C.-S.: Experimental determination of reactive oxygen species in Taipei aerosols, *J. Aerosol Sci.*, 32, 1201-1211, 2001.
- Jimenez, J. L., Canagaratna, M., Donahue, N., Prevot, A., Zhang, Q., Kroll, J. H., DeCarlo, P. F., Allan, J. D., Coe, H., and Ng, N.: Evolution of organic aerosols in the atmosphere, *Science*, 326, 1525-1529, 2009.
- Kalyanaraman, B., Darley-USmar, V., Davies, K. J., Dennery, P. A., Forman, H. J., Grisham, M. B., Mann, G. E., Moore, K., Roberts II, L. J., and Ischiropoulos, H.: Measuring reactive oxygen and nitrogen species with fluorescent probes: challenges and limitations, *Free Radic. Biol. Med.*, 52, 1-6, 2012.
- Katsumi, N., Miyake, S., Okochi, H., Minami, Y., Kobayashi, H., Kato, S., Wada, R., Takeuchi, M., Toda, K., and Miura, K.: Humic-like substances global levels and extraction methods in aerosols, *Environ. Res. Lett.*, 17, 1023-1029, 2019.
- King, L., and Weber, R.: Development and testing of an online method to measure ambient fine particulate reactive oxygen species (ROS) based on the 2',7'-dichlorofluorescein (DCFH) assay, *Atmos. Meas. Tech.*, 6, 1647-1658, 2013.
- Kogut, M. B., and Voelker, B. M.: Strong copper-binding behavior of terrestrial humic substances in seawater, *Environ. Sci. Technol.*, 35, 1149-1156, 2001.

167 Kuang, B. Y., Lin, P., Huang, X., and Yu, J. Z.: Sources of humic-like substances in the Pearl River Delta,  
 168 China: positive matrix factorization analysis of PM<sub>2.5</sub> major components and source markers, *Atmos. Chem.*  
 169 *Phys.*, 15, 1995-2008, 2015.

170 Lang, J., Zhang, Y., Zhou, Y., Cheng, S., Chen, D., Guo, X., Chen, S., Li, X., Xing, X., and Wang, H.:  
 171 Trends of PM<sub>2.5</sub> and chemical composition in Beijing, 2000–2015, *Aerosol Air Qual. Res.*, 17, 412-425,  
 172 2017.

173 Lazrus, A. L., Kok, G. L., Gitlin, S. N., Lind, J. A., and McLaren, S. E.: Automated fluorimetric method  
 174 for hydrogen peroxide in atmospheric precipitation, *Anal. Chem.*, 57, 917-922, 1985.

175 Li, X., Han, J., Hopke, P. K., Hu, J., Shu, Q., Chang, Q., and Ying, Q.: Quantifying primary and secondary  
 176 humic-like substances in urban aerosol based on emission source characterization and a source-oriented air  
 177 quality model, *Atmos. Chem. Phys.*, 19, 2327-2341, 2019.

178 Lin, P., Engling, G., and Yu, J.: Humic-like substances in fresh emissions of rice straw burning and in  
 179 ambient aerosols in the Pearl River Delta Region, China, *Atmos. Chem. Phys.*, 10, 6487-6500, 2010.

180 Perrone, M. G., Zhou, J., Malandrino, M., Sangiorgi, G., Rizzi, C., Ferrero, L., Dommen, J., and  
 181 Bolzacchini, E.: PM chemical composition and oxidative potential of the soluble fraction of particles at two  
 182 sites in the urban area of Milan, Northern Italy, *Atmos. Environ.*, 128, 104-113, 2016.

183 Scheinhardt, S., Müller, K., Spindler, G., and Herrmann, H.: Complexation of trace metals in size-  
 184 segregated aerosol particles at nine sites in Germany, *Atmos. Environ.*, 74, 102-109, 2013.

185 See, S., Wang, Y., and Balasubramanian, R.: Contrasting reactive oxygen species and transition metal  
 186 concentrations in combustion aerosols, *Environ. Res.*, 103, 317-324, 2007.

187 Tan, J., Xiang, P., Zhou, X., Duan, J., Ma, Y., He, K., Cheng, Y., Yu, J., and Querol, X.: Chemical  
 188 characterization of humic-like substances (HULIS) in PM<sub>2.5</sub> in Lanzhou, China, *Sci. Total Environ.*, 573,  
 189 1481-1490, 2016.

190 Tong, H., Arangio, A. M., Lakey, P. S., Berkemeier, T., Liu, F., Kampf, C. J., Brune, W. H., Pöschl, U.,  
 191 and Shiraiwa, M.: Hydroxyl radicals from secondary organic aerosol decomposition in water, *Atmos. Chem.*  
 192 *Phys.*, 16, 1761-1771, 2016.

193 Tong, H., Lakey, P. S., Arangio, A. M., Socorro, J., Shen, F., Lucas, K., Brune, W. H., Pöschl, U., and  
 194 Shiraiwa, M.: Reactive oxygen species formed by secondary organic aerosols in water and surrogate lung  
 195 fluid, *Environ. Sci. Technol.*, 52, 11642-11651, 2018.

196 Venkatachari, P., Hopke, P. K., Grover, B. D., and Eatough, D. J.: Measurement of particle-bound reactive  
 197 oxygen species in Rubidoux aerosols, *J. Atmos. Chem.*, 50, 49-58, 2005.

198 Wang, H., and Joseph, J. A.: Quantifying cellular oxidative stress by dichlorofluorescein assay using  
 199 microplate reader, *Free Radic. Biol. Med.*, 27, 612-616, 1999.

200 Wang, Y., Arellanes, C., Curtis, D. B., and Paulson, S. E.: Probing the source of hydrogen peroxide  
201 associated with coarse mode aerosol particles in Southern California, *Environ. Sci. Technol.*, 44, 4070-  
202 4075, 2010.

203 Wang, Y., Hopke, P. K., Sun, L., Chalupa, D. C., and Utell, M. J.: Laboratory and field testing of an  
204 automated atmospheric particle-bound reactive oxygen species sampling-analysis system, *J. Toxicol.*, 2011,  
205 419476, 2011.

206 Wang, Y., Arellanes, C., and Paulson, S. E.: Hydrogen peroxide associated with ambient fine-mode, diesel,  
207 and biodiesel aerosol particles in Southern California, *Aerosol Sci. Technol.*, 46, 394-402, 2012.

208 Wragg, F., Fuller, S. J., Freshwater, R., Green, D. C., Kelly, F. J., and Kalberer, M.: An automated online  
209 instrument to quantify aerosol-bound reactive oxygen species (ROS) for ambient measurement and health-  
210 relevant aerosol studies, *Atmos. Meas. Tech.*, 9, 4891-4900, 2016.

211 Zhou, J., Bruns, E. A., Zotter, P., Stefenelli, G., Prévôt, A. S., Baltensperger, U., El-Haddad, I., and  
212 Dommen, J.: Development, characterization and first deployment of an improved online reactive oxygen  
213 species analyzer, *Atmos. Meas. Tech.*, 11, 65-80, 2018.

214
