# Supplementary material for: Reactive species formed upon interaction of water with fine particulate matter from remote forest and polluted urban air
Source: Copernicus journal article supplement (doi:10.5194/acp-2020-973), 2020-10-20
Supplement: Supplementary file [file acp-2020-973-AC2-supplement.pdf]

## Response to the comments of Anonymous Referee #2

Tong et al. report systematic investigations on RS yields of ambient PM in clean and polluted environments using EPR spectroscopy. Furthermore, they found that using the surrogate mixtures can reproduce the relative fractions of different types of radicals formed by ambient PM, which would be useful for future laboratory studies. This ms is generally well written, highlighting the complicated mechanisms responsible for radical formation, but it lacks mechanistic insight into how different chemical compositions in PM generate different relative fractions of RS. I hope to see more detailed discussions about the mechanisms in the text, although it is understood that it may be beyond the scope of this study. Overall, I support this ms to be published in ACP after addressing the following points.

Response: We thank the referee #2 for reviewing and providing positive comments. The point-by-point responses are given below. We have highlighted changes to the manuscript text in blue.

### Major points

Can you elaborate why naphthalene and beta-pinene were used as representative SOA in Beijing and Hyytiälä, respectively? Anthropogenic and biogenic representatives?

Response: Thank you. First, monoterpenes have been found as major volatile organic compounds (VOC) associated with SOA formation in Hyytiälä, and the  $\alpha$ - and  $\beta$ -pinene are isomers accounting for > 60% of the total VOC (Kourtchev et al., 2008; Hakola et al., 2012). Moreover, previous studies found that  $\alpha$ - and  $\beta$ -pinene exhibit high SOA yield upon oxidation by  $O_3$  (Lee et al., 2006; Zhang et al., 2015), and the  $\beta$ -pinene SOA exhibit higher potentials in generating radicals and  $H_2O_2$  in water (Tong et al., 2016; Tong et al., 2017; Tong et al., 2018; Tong et al., 2019). Therefore,  $\beta$ -pinene was chosen as representative biogenic precursor for the SOA formation in Hyytiälä. In contrast, naphthalene has been found as key anthropogenic VOC in Beijing. Naphthalene has a high SOA yield from photooxidation and potentially contributes to SOA formation in Beijing (Chan et al., 2009; Huang et al., 2019). Recent studies also indicate that naphthalene SOA contains redox-active substances and may play an important role in the cytotoxicity of Beijing PM (Liu et al., 2020; Han et al., 2020). Thus, we choose naphthalene as representative anthropogenic precursor for the SOA formation in Beijing. We add the following section in the SI (lines 55-67) to elaborate why naphthalene and  $\beta$ -pinene were used as representative SOA precursors in Beijing and Hyytiälä, respectively:

### *Selection of SOA precursors*

*Monoterpenes have been found as major volatile organic compounds (VOC) in Hyytiälä, and  $\alpha$ - and  $\beta$ -pinene are isomers accounting for > 60% of the total VOC (Kourtchev et al., 2008; Hakola et al., 2012). Previous studies found that both  $\alpha$ - and  $\beta$ -pinene exhibit high SOA yield upon oxidation by  $O_3$  (Lee et al., 2006; Zhang et al., 2015), and  $\beta$ -pinene SOA exhibits a higher potential in generating RS in water (Tong et al., 2016; Tong et al., 2017; Tong et al., 2018; Tong et al., 2019). To shorten the collection time of SOA and minimize the influence of aerosol aging on the aqueous RS detection,  $\beta$ -pinene was chosen as representative biogenic precursor for the SOA formation in Hyytiälä. In contrast, naphthalene has been found as key anthropogenic VOC in Beijing, which has high SOA yield upon photooxidation and potentially important contribution to SOA formation in Beijing (Chan et al., 2009; Huang et al., 2019). Recently studies also indicate that naphthalene SOA are redox-active substances and may play an important role in cytotoxicity of Beijing PM (Liu et al., 2020; Han et al., 2020). Thus, we choose naphthalene as representative anthropogenic precursor for the SOA formation in Beijing.*

For the sample treatment procedure of HA or FA water suspensions, why was the procedure necessary? So, does it mean that a water-soluble fraction of HA or FA was extracted and only analyzed?

Response: Yes, we only analyzed the water-soluble fraction of HA or FA. There are reasons for filtering out the insoluble fraction of HA or FA as discussed in the following. According to previous studies, humic-like substances frequently account for a small mass fraction of ambient  $PM_{2.5}$  (< 10%, see Table S3). The solubility and chemical reactivity of these substances are largely unknown. The used HA or FA standard compounds can only be partly dissolved in water through a slow kinetic process. Thus, it is difficult to make an equivalent concentration of HA or FA suspension that can represent the water-soluble and insoluble fractions of humic-like substances contained in one ambient  $PM_{2.5}$  sample. Moreover, only by keeping the initial concentration of aqueous-phase HA or FA known, the chemical reaction mechanism of the surrogate compounds can be understood quantitatively. Finally, the co-existence of solid phase and aqueous-phase HA or FA in the surrogate solutions will complicate the chemistry upon inducing surface adsorption and chemistry. To clarify the necessity to use water-soluble fraction of HA and FA in this study, we add the following text in lines 29-37 of SI:

*HA or FA are used in this study as standard surrogate compounds for humic-like substances and are known to only partly dissolve in water through a slow kinetic process (Baduel et al., 2009; Verma et al., 2015). Thus, it is difficult to generate an equivalent concentration of a HA or FA suspension that can represent the water-soluble and insoluble fractions of humic-like substances contained in one ambient PM<sub>2.5</sub> sample. Only by keeping the initial concentration of aqueous-phase HA or FA known, the chemical reaction mechanism of the surrogate compounds can be understood quantitatively. Beyond this, the co-existence of solid phase and aqueous-phase HA or FA in the surrogate solutions will complicate the chemistry of the surrogate compounds upon potentially inducing surface adsorption and surface chemistry effects. Thus, for simplicity, we only analyzed the water-soluble fraction of HA or FA in this study.*

Relative fractions of different radicals, particularly organic and OH radicals, seem to be dependent on the origin of PM samples. What would be the most important factor determining such relative fractions?

Response: Thank you for pointing out this important question. To clarify the PM source-dependent formation mechanisms of radicals, we add the following discussions in the main text (lines 282-293):

*We speculate that hydrolytic or thermal decomposition of ROOH may play a major role in the formation of RS by PM<sub>2.5</sub> from remote forest locations like Hyytiälä, where large fractions of peroxide-containing HOM have been detected (Mutzel et al., 2015; Tröstl et al., 2016; Tong et al., 2019; Pye et al., 2019; Roldin et al., 2019; Bianchi et al., 2019). ROOH can generate •OH and O-centered organic radicals through decomposition ( $ROOH \rightarrow RO\bullet + \bullet OH$ ) and Fenton-like reactions ( $Fe^{2+} + ROOH \rightarrow Fe^{3+} + RO\bullet + OH^-$ ;  $Fe^{2+} + ROOH \rightarrow Fe^{3+} + RO^- + OH\bullet$ ) (Tong et al., 2016). Interconversion of  $RO\bullet$ ,  $R\bullet$  and  $ROO\bullet$  radicals can lead to the formation of  $O_2^{\bullet -}$  and  $H_2O_2$  (Chevallier et al., 2004; Tong et al., 2018), which can further react with  $Fe^{2+}$  to form •OH ( $Fe^{2+} + H_2O_2 \rightarrow Fe^{3+} + \bullet OH + OH^-$ ). In PM<sub>2.5</sub> from urban areas, transition metal ions and HULIS are expected to play a major role in aqueous-phase formation and interconversion of •OH,  $O_2^{\bullet -}$  and  $H_2O_2$  (Lloyd et al., 1997; Valavanidis et al., 2000; Zheng et al., 2013; Hayyan et al., 2016; Lakey et al., 2016; Tan et al., 2016; Kuang et al., 2017; Ma et al., 2018; Li et al., 2019).*

In Figure 4, why were only transition metals shown in its absolute concentration, whereas the others were in the relative abundance (%)?

Response: The used ICP-MS method for quantification of water-soluble transition metals is well-established and accurate. Therefore, we can obtain reliable results on the abundances of target transition metals in Hyytiälä, Mainz, and Beijing PM as well as the absolute concentrations of metal ions in water extracts of these PM. However, it remains a challenge to use mass spectrometry in combination with HPLC techniques to differentiate and quantify aromatic or HOM mixtures in ambient PM<sub>2.5</sub>, due to the various relationships of chromatographic area and concentrations of different aromatics or HOMs (Tong et al., 2019). Therefore, we cannot give the absolute concentration information of all aromatic compounds and HOMs. To clarify the different unit in Figure 4, we add the following text in lines 51-54 of SI:

*Due to the technique limitation, we are not able to quantify different aromatic or HOM species. In contrast, the method for quantification of water-soluble transition metals is well-established. Therefore, we can obtain reliable results on the absolute concentrations of target transition metals in Hyytiälä, Mainz, and Beijing PM or their water extracts.*

Lines 369-373: Why did naphthalene SOA have a lower radical yield than  $\beta$ -pinene SOA with the same mass concentration? This information should be important to generalize the findings of this study.

Response: To clarify the different mass-specific radical yields of naphthalene SOA and  $\beta$ -pinene SOA, we add the following text in lines 68-76 of SI:

*The mass-specific radical yield of laboratory-generated SOA is strongly dependent on the abundance of peroxide-containing highly oxygenated organic molecules (Tong et al., 2019), which are involved in radical formation upon thermal-, hydrolytic-, and photolytic- decompositions as well as Fenton-like reactions in water (Chen et al., 2011; Badali et al., 2015; Tong et al., 2016). Previous studies found that the mass fraction of organic peroxides in  $\beta$ -pinene SOA (42%) can be two times higher than in Naphthalene SOA (19-28%) (Kautzman et al., 2010; Tong et al., 2018). Our recent findings showed a positive correlation of HOM abundance and radical yields by both ambient PM and laboratory-generated SOA (Tong et al., 2019). Therefore, we suggest that the low abundance of peroxide-containing HOMs in naphthalene SOA is the major reason for its lower radical yield than  $\beta$ -pinene SOA.*

It seems that consistently the higher relative fraction of C-centered radicals is associated with the lower relative fraction of OH radicals. Does it suggest that OH radicals are consumed by something to generate C-centered radicals? This point deserves detailed discussions in the text.

Response: Thank you. We agree with that aqueous OH radicals may react with water-soluble organic compounds to form O-centered organic radicals, the rearrangement of which can form C-centered organic radicals (Chevallier et al., 2004). We noted this point by adding the following text in lines 270-271 of the main text:

*Moreover, rearrangement reactions in water can convert  $RO^\bullet$  into  $R^\bullet$  (Chevallier et al., 2004), which may warrant further investigation.*

When HA was replaced by FA, the dominant radical species becomes  $O_2^\bullet$  from C-centered radical. Do you any explanation on the different radical distribution?

Response: The major formation of  $O_2^\bullet$  in aqueous mixtures of CHP+ $Fe^{2+}$ +FA but C-centered radicals in CHP+ $Fe^{2+}$ +HA may reflect the different reactivities of FA from HA in Fenton-like reactions. To clarify this point, we add the following text in lines 408-412:

*Different reactivities of HA and FA are also reflected by the different RF values of  $O_2^\bullet$  and C-centered radicals observed at high concentrations of FA and HA (Figure 6h vs. Figure 6f) as well as in reactions mixtures with copper instead of iron ions (Figure S6). Further investigations will be required to resolve the underlying reaction mechanisms and kinetics.*

Lines 496-498: It is said that “the higher relative amount of detected radicals and  $H_2O_2$  formed by urban  $PM_{2.5}$  can see as a measure of higher potential oxidative damage”, but the totally formed radical amount decreases with PM mass. The statement seems contradicting and needs clarification.

Response: Thank you. We replaced this sentence with the following text (lines 431-433):

*Overall, our findings show how the composition of  $PM_{2.5}$  can influence the amount and nature of aqueous-phase RS, which may explain differences in the chemical reactivity and health effects of particulate matter in clean and polluted air.*

Minor points:

Line 236: The -> the

Response: We corrected this typo.

## References

- Badali, K., Zhou, S., Aljawhary, D., Antiñolo, M., Chen, W., Lok, A., Mungall, E., Wong, J., Zhao, R., and Abbatt, J.: Formation of hydroxyl radicals from photolysis of secondary organic aerosol material, *Atmos. Chem. Phys.*, 15, 7831-7840, 2015.
- Baduel, C., Voisin, D., and Jaffrezo, J.-L.: Comparison of analytical methods for Humic Like Substances (HULIS) measurements in atmospheric particles, *Atmos. Chem. Phys.*, 9, 5949-5962, 2009.
- Bianchi, F., Kurtén, T., Riva, M., Mohr, C., Rissanen, M. P., Roldin, P., Berndt, T., Crounse, J. D., Wennberg, P. O., and Mentel, T. F.: Highly oxygenated organic molecules (HOM) from gas-phase autoxidation involving peroxy radicals: A key contributor to atmospheric aerosol, *Chem. Rev.*, 119, 3472-3509, 2019.
- Chan, A. W. H., Kautzman, K., Chhabra, P., Surratt, J., Chan, M., Crounse, J., Kürten, A., Wennberg, P., Flagan, R., and Seinfeld, J.: Secondary organic aerosol formation from photooxidation of naphthalene and alkylnaphthalenes: implications for oxidation of intermediate volatility organic compounds (IVOCs), *Atmos. Chem. Phys.*, 9, 3049-3060, 2009.
- Chen, Q., Liu, Y., Donahue, N. M., Shilling, J. E., and Martin, S. T.: Particle-phase chemistry of secondary organic material: modeled compared to measured O: C and H: C elemental ratios provide constraints, *Environ. Sci. Technol.*, 45, 4763-4770, 2011.
- Chevallier, E., Jolibois, R. D., Meunier, N., Carlier, P., and Monod, A.: "Fenton-like" reactions of methylhydroperoxide and ethylhydroperoxide with  $\text{Fe}^{2+}$  in liquid aerosols under tropospheric conditions, *Atmos. Environ.*, 38, 921-933, 2004.
- Hakola, H., Hellén, H., Hemmilä, M., Rinne, J., and Kulmala, M.: In situ measurements of volatile organic compounds in a boreal forest, *Atmos. Chem. Phys.*, 12, 11665-11678, 2012.
- Han, J., Wang, S., Yeung, K., Yang, D., Gu, W., Ma, Z., Sun, J., Wang, X., Chow, C.-W., and Chan, A. W.: Proteome-wide effects of naphthalene-derived secondary organic aerosol in BEAS-2B cells are caused by short-lived unsaturated carbonyls, *Proc. Natl. Acad. Sci. U.S.A.*, 10.1073/pnas.2001378117, 2020.
- Hayyan, M., Hashim, M. A., and AlNashef, I. M.: Superoxide ion: generation and chemical implications, *Chem. Rev.*, 116, 3029-3085, 2016.
- Huang, G., Liu, Y., Shao, M., Li, Y., Chen, Q., Zheng, Y., Wu, Z., Liu, Y., Wu, Y., Hu, M., Li, X., Lu, S., Wang, C., Liu, J., Zheng, M., and Zhu, T.: Potentially Important Contribution of Gas-Phase Oxidation of Naphthalene and Methylnaphthalene to Secondary Organic Aerosol during Haze Events in Beijing, *Environ. Sci. Technol.*, 53, 1235-1244, 2019.
- Kautzman, K., Surratt, J., Chan, M., Chan, A., Hersey, S., Chhabra, P., Dalleska, N., Wennberg, P., Flagan, R., and Seinfeld, J.: Chemical composition of gas-and aerosol-phase products from the photooxidation of naphthalene, *J. Phys. Chem. A*, 114, 913-934, 2010.
- Kourtchev, I., Ruuskanen, T., Keronen, P., Sogacheva, L., Dal Maso, M., Reissell, A., Chi, X., Vermeylen, R., Kulmala, M., Maenhaut, W., and Claeys, M.: Determination of isoprene and  $\alpha$ - $\beta$ -pinene oxidation products in boreal forest aerosols from Hyytiälä, Finland: diel variations and possible link with particle formation events, *Plant Biol.*, 10, 138-149, 2008.
- Kuang, X. M., Scott, J. A., da Rocha, G. O., Betha, R., Price, D. J., Russell, L. M., Cocker, D. R., and Paulson, S. E.: Hydroxyl radical formation and soluble trace metal content in particulate matter from renewable diesel and ultra low sulfur diesel in at-sea operations of a research vessel, *Aerosol Sci. Technol.*, 51, 147-158, 2017.

Lakey, P. S., Berkemeier, T., Tong, H., Arangio, A. M., Lucas, K., Pöschl, U., and Shiraiwa, M.: Chemical exposure-response relationship between air pollutants and reactive oxygen species in the human respiratory tract, *Sci. Rep.*, 6, 32916, 2016.

Lee, A., Goldstein, A. H., Keywood, M. D., Gao, S., Varutbangkul, V., Bahreini, R., Ng, N. L., Flagan, R. C., and Seinfeld, J. H.: Gas-phase products and secondary aerosol yields from the ozonolysis of ten different terpenes, *J. Geophys. Res.*, 111, D07302, 2006.

Li, X., Han, J., Hopke, P. K., Hu, J., Shu, Q., Chang, Q., and Ying, Q.: Quantifying primary and secondary humic-like substances in urban aerosol based on emission source characterization and a source-oriented air quality model, *Atmos. Chem. Phys.*, 19, 2327-2341, 2019.

Liu, F., Saavedra, M. G., Champion, J. A., Griendling, K. K., and Ng, N. L.: Prominent Contribution of Hydrogen Peroxide to Intracellular Reactive Oxygen Species Generated upon Exposure to Naphthalene Secondary Organic Aerosols, *Environ. Sci. Technol. Lett.*, 7, 171-177, 2020.

Lloyd, R. V., Hanna, P. M., and Mason, R. P.: The origin of the hydroxyl radical oxygen in the Fenton reaction, *Free Radical Biol. Med.*, 22, 885-888, 1997.

Ma, Y., Cheng, Y., Qiu, X., Cao, G., Fang, Y., Wang, J., Zhu, T., Yu, J., and Hu, D.: Sources and oxidative potential of water-soluble humic-like substances (HULIS WS) in fine particulate matter (PM<sub>2.5</sub>) in Beijing, *Atmos. Chem. Phys.*, 18, 5607-5617, 2018.

Mutzel, A., Poulain, L., Berndt, T., Iinuma, Y., Rodigast, M., Böge, O., Richters, S., Spindler, G., Sipilä, M., Jokinen, T., Markku, K., and Hartmut, H.: Highly oxidized multifunctional organic compounds observed in tropospheric particles: A field and laboratory study, *Environ. Sci. Technol.*, 49, 7754-7761, 2015.

Pye, H. O., D'Ambro, E. L., Lee, B. H., Schobesberger, S., Takeuchi, M., Zhao, Y., Lopez-Hilfiker, F., Liu, J., Shilling, J. E., and Xing, J.: Anthropogenic enhancements to production of highly oxygenated molecules from autoxidation, *Proc. Natl. Acad. Sci. U.S.A.*, 116, 6641-6646, 2019.

Roldin, P., Ehn, M., Kurtén, T., Olenius, T., Rissanen, M. P., Sarnela, N., Elm, J., Rantala, P., Hao, L., and Hyttinen, N.: The role of highly oxygenated organic molecules in the Boreal aerosol-cloud-climate system, *Nat. Commun.*, 10, 1-15, 2019.

Tan, J., Xiang, P., Zhou, X., Duan, J., Ma, Y., He, K., Cheng, Y., Yu, J., and Querol, X.: Chemical characterization of humic-like substances (HULIS) in PM<sub>2.5</sub> in Lanzhou, China, *Sci. Total Environ.*, 573, 1481-1490, 2016.

Tong, H., Arangio, A. M., Lakey, P. S., Berkemeier, T., Liu, F., Kampf, C. J., Brune, W. H., Pöschl, U., and Shiraiwa, M.: Hydroxyl radicals from secondary organic aerosol decomposition in water, *Atmos. Chem. Phys.*, 16, 1761-1771, 2016.

Tong, H., Lakey, P. S., Arangio, A. M., Socorro, J., Kampf, C. J., Berkemeier, T., Brune, W. H., Pöschl, U., and Shiraiwa, M.: Reactive oxygen species formed in aqueous mixtures of secondary organic aerosols and mineral dust influencing cloud chemistry and public health in the Anthropocene, *Faraday Discuss.*, 200, 251-270, 2017.

Tong, H., Lakey, P. S., Arangio, A. M., Socorro, J., Shen, F., Lucas, K., Brune, W. H., Pöschl, U., and Shiraiwa, M.: Reactive oxygen species formed by secondary organic aerosols in water and surrogate lung fluid, *Environ. Sci. Technol.*, 52, 11642-11651, 2018.

Tong, H., Zhang, Y., Filippi, A., Wang, T., Li, C., Liu, F., Leppla, D., Kourtchev, I., Wang, K., Keskinen, H.-M., Levula, J. T., Arangio, A. M., Shen, F., Ditas, F., Martin, S. T., Artaxo, P., Godoi, R. H. M., Yamamoto, C. I., Souza, R. A. F. d., Huang, R.-J., Berkemeier, T., Wang, Y., Su, H., Cheng, Y., Pope, F. D., Fu, P., Yao, M., Pöhlker, C., Petäjä, T., Kulmala, M., Andreae, M. O., Shiraiwa, M., Pöschl, U., Hoffmann, T., and Kalberer, M.: Radical Formation by Fine Particulate Matter Associated with Highly Oxygenated Molecules, *Environ. Sci. Technol.*, 53, 12506-12518, 2019.

Tröstl, J., Chuang, W. K., Gordon, H., Heinritzi, M., Yan, C., Molteni, U., Ahlm, L., Frege, C., Bianchi, F., and Wagner, R.: The role of low-volatility organic compounds in initial particle growth in the atmosphere, *Nature*, 533, 527-531, 2016.

Valavanidis, A., Salika, A., and Theodoropoulou, A.: Generation of hydroxyl radicals by urban suspended particulate air matter. The role of iron ions, *Atmos. Environ.*, 34, 2379-2386, 2000.

Verma, V., Wang, Y., El-Afifi, R., Fang, T., Rowland, J., Russell, A. G., and Weber, R. J.: Fractionating ambient humic-like substances (HULIS) for their reactive oxygen species activity—Assessing the importance of quinones and atmospheric aging, *Atmos. Environ.*, 120, 351-359, 2015.

Zhang, X., McVay, R. C., Huang, D. D., Dalleska, N. F., Aumont, B., Flagan, R. C., and Seinfeld, J. H.: Formation and evolution of molecular products in  $\alpha$ -pinene secondary organic aerosol, *Proc. Natl. Acad. Sci. U.S.A.*, 112, 14168-14173, 2015.

Zheng, G., He, K., Duan, F., Cheng, Y., and Ma, Y.: Measurement of humic-like substances in aerosols: A review, *Environ. Pollut.*, 181, 301-314, 2013.
